# Supplementary material
Source: Springer Nature journal article supplement (https://www.springermedizin.de/resource/supplementary/12888_2009_663_MOESM3_ESM.pdf/9478092)

---

**Study Name****Statistics for each study****Events / Total****Odds ratio and 95% CI**

|                              | <b>Odds<br/>ratio</b> | <b>Lower<br/>limit</b> | <b>Upper<br/>limit</b> | <b>Z-Value</b> | <b>p-Value</b> |
|------------------------------|-----------------------|------------------------|------------------------|----------------|----------------|
| Compton, 2000 <sup>2</sup>   | 0.855                 | 0.578                  | 1.265                  | -0.783         | 0.434          |
| Castaneda, 1985 <sup>3</sup> | 0.613                 | 0.368                  | 1.023                  | -1.874         | 0.061          |
| Coid, 2000 <sup>4</sup>      | 0.217                 | 0.151                  | 0.313                  | -8.184         | 0.000          |
| Maden, 1999 <sup>6</sup>     | 0.221                 | 0.088                  | 0.558                  | -3.193         | 0.001          |
| Trestman, 2007 <sup>7</sup>  | 0.759                 | 0.510                  | 1.131                  | -1.354         | 0.176          |
| Huang, 2006 <sup>8</sup>     | 1.164                 | 1.087                  | 1.245                  | 4.367          | 0.000          |
| Coid, 1999 <sup>5</sup>      | 0.209                 | 0.145                  | 0.301                  | -8.409         | 0.000          |
|                              | <b>0.476</b>          | <b>0.248</b>           | <b>0.915</b>           | <b>-2.227</b>  | <b>0.026</b>   |

**Black****White**

|             |              |
|-------------|--------------|
| 109 / 258   | 77 / 167     |
| 25 / 558    | 41 / 577     |
| 33 / 628    | 452 / 2224   |
| 6 / 100     | 28 / 125     |
| 78 / 177    | 111 / 218    |
| 1368 / 8245 | 3578 / 24507 |
| 33 / 648    | 470 / 2303   |

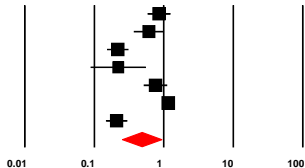

Supplement: MOESM3 [file 9478092]
